# Supplementary material for: Lipase-Responsive Amphotericin B Loaded PCL Nanoparticles for Antifungal Therapies
Source: MDPI journal article supplement (doi:10.3390/nano13010155), 2022-12-29
Supplement: s1 [file s1]

## SUPPORTING INFORMATION

### Lipase-Responsive Amphotericin B Loaded PCL Nanoparticles for Antifungal Therapies

Evelyn Osehontue Uroro <sup>1</sup>, Richard Bright <sup>2,\*</sup>, Andrew Hayles <sup>2</sup> and Krasimir Vasilev <sup>1,2,\*</sup>

<sup>1</sup> UniSA STEM, University of South Australia, Mawson Lakes, South Australia, SA 5095, Australia

<sup>2</sup> College of Medicine and Public Health, Flinders University, Bedford Park, SA 5042, Australia

\* Correspondence: richard.bright@flinders.edu.au (R.B.); krasimir.vasilev@flinders.edu.au (K.V.)

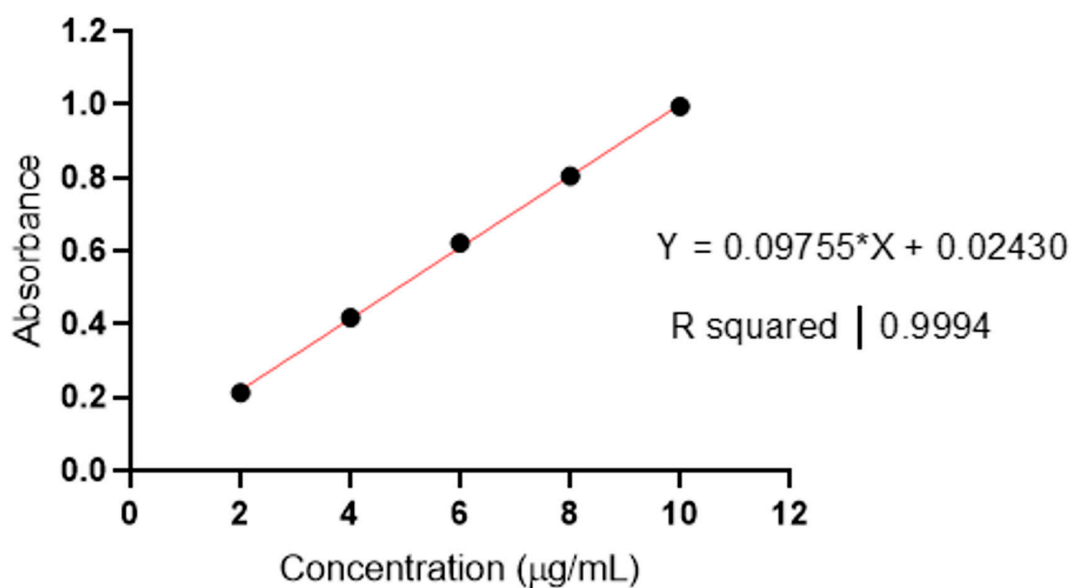

**Figure S1.** Calibration curve of AMB in DMSO.

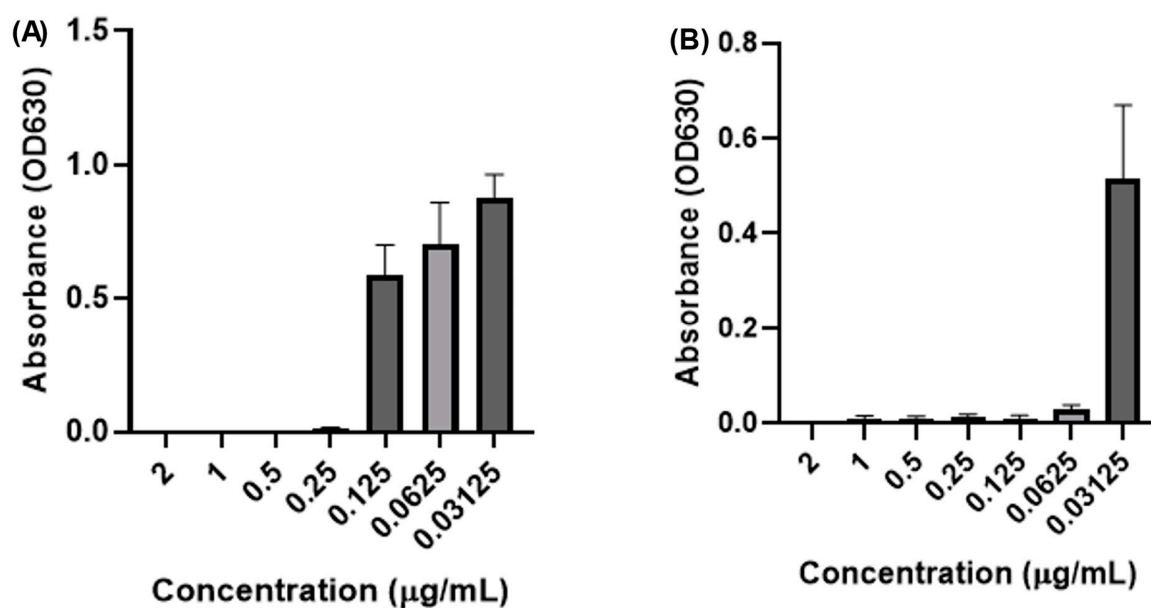

**Figure S2.** MIC of AMB (A) and PCL-AMB NPs (B).

**Table S1:** Summary of results for the disk diffusion assay.

| Sample                 | Zone of Inhibition (mm) |
|------------------------|-------------------------|
| PCL NPs                | 0                       |
| 0.25% DMSO in MQ water | 0                       |
| AMB in 0.25% DMSO      | $18.7 \pm 0.3$          |
| PCL-AMB NPs            | $21.0 \pm 1.0$          |
